# Supplementary material for: Rational design of antimicrobial peptides: an optimization approach
Source: Royal Society of Chemistry journal article supplement (doi:10.1039/d3me00109a), 2023-12-12
Supplement: d3me00109a1.xlsx [file d3me00109a1.xlsx]

## Sheet: Title
Rational design of antimicrobial peptides: An optimization approach Danush Sadasivam, Pranav Nambiar, Arnab Dutta*, Debirupa Mitra* Chemical Engineering Department Birla Institute of Technology and Science (BITS) Pilani, Hyderabad Campus Jawahar Nagar, Medchal District, Hyderabad-500078, Telangana, India
*Corresponding authors: Email: arnabdutta@hyderabad.bits-pilani.ac.in (Arnab); debirupa@hyderabad.bits pilani.ac.in (Debirupa). Tel: +9140 66303758 (Arnab); +9140 66303768 (Debirupa)

## Sheet: Amino Acid Integer Code
Integer code	Amino Acid Symbol
1	A
2	R
3	N
4	D
5	C
6	Q
7	E
8	G
9	H
10	I
11	L
12	K
13	M
14	F
15	P
16	S
17	T
18	W
19	Y
20	V

## Sheet: Shapiro-Wilk Test
Property	AMP p-value	non-AMP p-value
Charge	5.81829e-22	5.64335e-09
Charge Density	1.8557e-20	4.22137e-15
Levitt alpha	1.21692e-09	1.50305e-08
Solvation Free Energy	0.00166189	1.1778e-12
Normalized frequency of alpha-helix	1.55238e-08	0.00375673
Normalized frequency of coil	1.30912e-12	6.64597e-08
Hydrophobic Moment-KD	1.0933e-07	1.40932e-09

## Sheet: Length v Fitness
Length	Sequence	Fitness Score	Charge	Charge Density	Levitt alpha	Solvation Free Energy	Normalized frequency of alpha-helix	Normalized frequency of coil	Hydrophobic Moment	Hydrophobicity (%)
10	KNWQGTAFQS	-0.00182729	0.996	0.000854019	1.022	0.449	1.015	0.973	0.221971	30
11	RYGDLWFSAQK	-0.00196465	0.995	0.000726007	1.02273	0.453636	1.00909	0.987273	0.212964	36.3636
12	KIQAGCGWHSQT	-0.00182485	1.027	0.000780715	1.00917	0.475833	1.00333	0.974167	0.203838	33.3333
13	KWDWRSASGTMFK	-0.001976	1.996	0.00124765	1.02231	0.513077	1.02385	0.982308	0.196094	38.4615
14	CSLRDGMLVRWFGK	-0.00147521	1.929	0.00115647	1.02	0.501429	1	0.982143	0.216759	50
15	VGFAFRSDYMLRHKG	-0.000812765	2.094	0.00117373	1.012	0.49	1.014	0.976667	0.214581	40
16	EWRKSCVITKSIFQST	-0.000771471	1.929	0.00100825	1.01562	0.464375	1.00562	0.97125	0.199625	37.5
17	HTWCERFKKYTVCQIGS	-0.000485566	1.96	0.000939417	1.01471	0.478235	1.01	0.972353	0.200826	35.2941
18	PGFKHCFLRGYQDVCCKH	-0.000537384	1.99	0.000930559	1.01167	0.475556	1.01222	0.972778	0.218174	38.8889
19	RSFYKERIHVMVNGMGQTH	-0.000516351	2.194	0.000957815	1.02526	0.476842	1.00895	0.982105	0.205402	31.5789
20	HLRCRTIDEWFRYHYKVNFT	-0.000411018	2.126	0.000791797	1.0215	0.4485	1.0105	0.979	0.210737	35
21	QFKKTFDLPCNNSLTHKVSSV	-0.000310116	2.027	0.000846799	1.01476	0.493333	1.00952	0.975714	0.20794	33.3333
22	CRKWVCTTIETRWRHNWLFTHN	-0.00029365	3.06	0.00105945	1.02318	0.485909	1.01318	0.975	0.207992	40.9091
23	EFFQGQKRNPGAFRTWCTMVRCW	-0.000113586	2.862	0.00100446	1.01522	0.478261	1.01261	0.975652	0.208065	43.4783
24	RCLGKYQQHTNWFARDRTFAFWCP	-0.000147821	2.959	0.000975785	1.0225	0.477917	1.01125	0.974583	0.2111	41.6667
25	RRQFELAFLVDTPPTRVKWINNLYK	-9.92583e-05	2.997	0.000965031	1.016	0.5076	1.0112	0.976	0.205336	40
26	CTRFILECSVCFALHGARWTGKGYRQ	-8.37207e-05	2.892	0.00096288	1.01615	0.473846	1.00962	0.974615	0.206897	46.1538
27	RCCPGWFIEGVKACVKHQSDSICKYKF	-7.02082e-05	2.825	0.00090149	1.01741	0.484815	1.01481	0.972593	0.209492	44.4444
28	RKCITVIPLYVEDCKKASAVGSPHKQCW	-3.34014e-05	2.892	0.000914976	1.01786	0.496429	1.01214	0.977857	0.20796	42.8571
29	FFGINCNLCPKWYEQKKTTTHNHTQTCTK	-3.44173e-05	2.991	0.00086123	1.0169	0.484828	1.01138	0.972069	0.208219	27.5862
30	RWAKCYGVYTVEGKFEQTNVCCMKVHNIGK	-2.68987e-05	2.892	0.000827923	1.019	0.485667	1.01233	0.975667	0.205848	40
31	KMICGKFHVGWVATQGESRKYYQCGKTACDW	-5.8863e-05	2.891	0.000807062	1.01548	0.496452	1.00968	0.975161	0.204657	38.7097
32	HAWGFHIWIKNQRPLSEYARGFGRLDLTCRQI	-0.000112408	3.127	0.000807923	1.01906	0.48625	1.01219	0.978438	0.20298	40.625
33	SRSTFWPRQPDPFKHHMCLRQTTSVKDLWDLIK	-7.81255e-05	3.127	0.000771021	1.01909	0.487879	1.01091	0.976364	0.207596	33.3333
34	GHCLAWGPFLLSAFIFSTRRGDHHGRMMCRRDVQ	-0.000128284	3.158	0.000797559	1.02206	0.471765	1.01176	0.976176	0.207507	44.1176
35	CAIWIAEDRSWHRSRRQKRVSQSITGEILVFIPFW	-0.000137607	3.03	0.00070912	1.01886	0.476857	1.01114	0.974	0.207402	45.7143
36	RGGKNKDVGDLWCVPFAWRMSNAAQTQVGGWAKQLL	-9.89545e-05	2.929	0.000734166	1.01861	0.481111	1.01333	0.974444	0.207415	44.4444
37	DEVVVYARRIRLKVAYFARLEGKIYNQHCNFPQVTGW	-0.000237684	3.028	0.000681815	1.01622	0.485135	1.00838	0.975676	0.214331	43.2432
38	STTEALWMIKSCVKLNLRDGTWHRGHFSCHGTKVNQTT	-0.000154039	3.158	0.000726826	1.01579	0.466053	1.01158	0.976316	0.206925	34.2105
39	QNFAWLTDDGYYIEQKLKWAVSLRARKCSLTVATGKGTP	-0.000208679	2.928	0.00066289	1.01718	0.484103	1.01282	0.974872	0.204576	38.4615
40	NGGSGHIKLLCSSCTARTKKLIIHWFECTNWPCKAQDGAI	-0.000238157	2.924	0.000666197	1.01725	0.516	1.01175	0.978	0.210889	42.5
41	TVLVQQYKSKCNWTYHADIPKTIERDVKYVAPEALRARWGI	-0.000309963	3.028	0.000624517	1.02098	0.47878	1.01293	0.975366	0.208444	39.0244
42	HRWIWKDEDPAQCLNKLQRTIRQAGGAPPTIHRAWTLIPINF	-0.000319207	3.128	0.000631961	1.01405	0.510476	1.01167	0.976667	0.207977	40.4762
43	IFAVEKYKNSCNIARKAFRYFFNFNCGFDKLKGTLCDGPVLNC	-0.000402189	3.725	0.000751499	1.01767	0.501163	1.0114	0.976047	0.214155	46.5116
44	TDLWGDHTPIVKNKACQRCASWVAPAAWTGCKYHSRIRNEIQFF	-0.000417707	2.992	0.000585887	1.0175	0.489545	1.01318	0.9775	0.202485	43.1818
45	HITGKTTCIQGTAHSYRTWVDDYLWKGTTMGDAAWMGANAAKRAK	-0.000335404	3.125	0.000628573	1.01267	0.491111	1.01	0.973556	0.207784	37.7778
46	KMCNAHSQCFGGVRAWVAPWKDGWSDLCTVYGAIEDIRKRFITAKS	-0.000461635	2.893	0.000555922	1.0137	0.481304	1.01087	0.977609	0.209805	45.6522
47	KGCSQVQQLRKLFSSKFLFYYIKCSCDFFRETPGWERPYCDFVNAVK	-0.000527592	3.726	0.000657777	1.0183	0.513191	1.01149	0.975957	0.209581	40.4255
48	HVNQHYSPHGICDSAWEGGIIHRTAIKCLKETKKICPIFSNFTRHQCC	-0.000482022	3.154	0.000572483	1.01771	0.483125	1.01313	0.976875	0.202129	37.5
49	CFVKEADTENISWICKTWCKGSEVCTYTFSPRYYKFCKEVCRRTLKVLT	-0.000529493	3.593	0.000612529	1.01837	0.474286	1.01286	0.977959	0.210224	40.8163
50	NGVCCIIHVQAHTFDEDDLPINYKPMGAAKKTCVGGKIINKANWKIANKG	-0.000479448	2.991	0.000551204	1.0148	0.4868	1.0124	0.9724	0.210345	42
51	CGHPGVIIEKKVDQGLNQYSRWIMNVCGKHHCLIGHGHQKDNKAHVGGMLT	-0.000430888	3.387	0.000599838	1.01549	0.492353	1.01118	0.974706	0.21046	35.2941
52	VKVWYWTQEWEPAFQCVLRPTKTYTVRCQTCRKYFIDSCFRSEFPCTFRCEK	-0.000661571	3.593	0.000553068	1.01519	0.498269	1.01173	0.975385	0.210661	40.3846
53	CQVGVTPAVRCVWSLWDWCARRFPHRFPAQGPVIAERAARGCSDLHFNIQQHL	-0.000697486	3.024	0.000496717	1.01679	0.51434	1.01396	0.972453	0.210155	49.0566
54	LLCKCEGPAIVCSKTPKDGLCRKVETRGKIFYCIPQVWIRSLQCFGCEEKTIYC	-0.000581664	3.459	0.000561582	1.01889	0.490556	1.00926	0.975741	0.21084	44.4444
55	AVAGAAYRGTSVSQGHIKILIGDQNCLKEGGKLEGAIMTVGTGACHYINKATKMN	-0.000506996	3.059	0.00054156	1.01418	0.484	1.01091	0.976	0.211308	40
56	RCCEKFKSKCEWVFVVVRGPTVKCMPALCDDDGFTPRLISNNQKRMFWKPDFCCVT	-0.000684064	3.527	0.000537262	1.01768	0.470536	1.01161	0.973036	0.209436	46.4286
57	KQSCGVNCDKHVLQVWTYFCTRITSCKHHSRNHPQEHLDVFHKQWGTGKIWGDCLGW	-0.000765988	3.252	0.000482664	1.01298	0.485263	1.01105	0.972982	0.206974	35.0877
58	AHIRILDGLNRIVWTAIWVTIHDWKPIDSTARSASYKQHCGTLVHVRAEKRPANEWTS	-0.000724135	3.326	0.00049593	1.015	0.488793	1.01362	0.976552	0.211086	41.3793
59	WDRYFNSSSFVGDRQDAWHRHIAQFKQAWHSICPWRPGNTAKFFCYFHKAYQRFDVDIQ	-0.000860473	3.256	0.000446146	1.01678	0.493559	1.01186	0.973559	0.21139	38.9831
60	ENGAIQVIGRRSVHWHGNLPTTNWHIGHDETCTVKISIKAHKMAQDVTWTWSRKWNCLTQ	-0.00084329	3.358	0.000481168	1.01383	0.499667	1.01083	0.9745	0.215291	36.6667
61	CERPFPTCSKAICVASIPFTECPDDFWDEKKCLTGFKRWTARRIMINPCQWHVLGNRIKQV	-0.000840716	3.694	0.000515031	1.01672	0.481311	1.01377	0.975902	0.209361	44.2623
62	QSWGLRRVIKSAWIMGLCVATCGHPIRRVIFFSCEGETKCSEMCSKTDTPLGDFNCKWQFQR	-0.000858979	3.694	0.000517055	1.01952	0.478548	1.00919	0.977258	0.209204	43.5484
63	PQWGYCTVDQEVDPCQWSISKIKFVQGACWRKPACTSDCPKDRVRIMSFEFVRFFKTKDKLCW	-0.000982609	3.594	0.000477625	1.01667	0.479841	1.0119	0.968889	0.209976	42.8571
64	QCDVCCFITTMVGCVQKPFGAEIQRMCKLCWCMVKPQKKISFGHCGRENFVGDGGPESSCFTRK	-0.000847933	3.491	0.000487879	1.01641	0.475625	1.00922	0.972031	0.209865	43.75
65	QVALVIKRTRTCSDFWFECGEPTKESWTRRFRMGGCCCGTERGHVCLFLQPWMQTTWKTWNAISC	-0.000931803	3.627	0.000473137	1.01738	0.498769	1.01246	0.975077	0.206468	43.0769
66	SMDYQLDWPQKAGQVWLGTCFGSARDITCFCTAMTVPCDGLNWVRREGTKRFVEASAYLKKCPKWK	-0.000930151	3.66	0.000482802	1.01894	0.498182	1.01182	0.977121	0.211361	42.4242
67	YAGATTCVWKPKNQVSADVLVHAGHVHEPGGQAADNILKRMMQIDKGAFNSQCKVSNVGAYQKVAPG	-0.000873713	3.157	0.000445021	1.01761	0.485075	1.01522	0.974627	0.20763	40.2985
68	IGKKNCNLSHRVEVYAFAPVGHKGDWIRKFVTGWPWFVDYVRQEATDQRQCREDWISIRAMFLAICSS	-0.00114214	2.995	0.000373528	1.01838	0.484265	1.01441	0.9725	0.210402	44.1176
69	CKCCVQRIHWSLFVAEVEFSPTPAFSLRRVCSCCQRGSAICAKSVPCFLKEGGNFCQFQRNVQVVNDPF	-0.000954838	3.491	0.000448885	1.01986	0.488841	1.01	0.975072	0.207874	49.2754
70	DLLCKTQRGNQWEVAKNWSRAMGCEHWCVAVLCCLWGRWSGGGCKGDQKVDQLICFVPTFTFHSLKRGGS	-0.000999598	3.724	0.000471925	1.01714	0.477143	1.01171	0.976571	0.211244	44.2857
71	SCQEFDQNSNGKKAICGHKVDDGWVRRIRPFKMLCDIPWKVNFIKAWRLWDFCKVAVRVPVEVNWYGADIC	-0.00112342	3.76	0.000448274	1.01676	0.482958	1.01141	0.971972	0.208203	47.8873
72	RFCSTRGNTFSQWLFSVCKLCQSGKGSHETSWGEADGVCVLNVLSWRQVVKQCQKLPWEAWAAGMGVGKSQV	-0.00106254	3.761	0.000471298	1.01625	0.509861	1.01375	0.976806	0.209137	43.0556
73	KIASCTIPTGDAWTGKKDMPCDVARWLCVNFGKVSQRVIEILRDICSVCPKAVPIERALKCVKFCHCPSEPTQ	-0.00107574	3.559	0.000439786	1.01315	0.488219	1.00918	0.975068	0.204714	46.5753
74	VKGWANCVTEGGCVVRGAATNAKHNVANPCCRCKVAVEMCTPGCDVTGNWQTCFGKAHMAGKQFLISLAMQGTN	-0.000949378	3.655	0.000471797	1.01797	0.493919	1.01122	0.975405	0.211269	47.2973
75	GNVDRDWLTKHGAFCEHIHAYVRKRGQTRYKPRWDVRQNIEEPHIFLPWLKRLNFDYIDMVQVAMTWIGDRCIFP	-0.00127805	3.26	0.000354907	1.01773	0.484933	1.01213	0.974	0.214775	40

## Sheet: GA Parameters
GA Parameters for PyGAD package:
( L = Length of sequence )
Number of Generations: 100
Number of genes: L
Population size: 10*L
Parents selection type: ‘rank’
Gene type: int
Stop criteria: ‘reach_0’

## Sheet: AMPD Tool
AMPD Executable Link: https://drive.google.com/drive/folders/1BE5XJSQpzfjsAIhFmD_CCA4o3Md7HYG1?usp=sharing
